# Supplementary material for: Are the Physical Environments of Treatment Centres Meeting Recommendations for Patient-Centred Care? Perceptions of Haematological Cancer Patients
Source: MDPI journal article supplement (doi:10.3390/ijerph18094892), 2021-05-04
Supplement: s1 [file s1]

**Table S1: Copy of the Treatment Centre Physical Environment Questionnaire**

**We would like to know your views about the physical environment of the hospital where you received most of your cancer treatment.**

| <i>Please circle how much you agree or disagree with the following statements:</i> |                                                   | <b>Strongly Disagree</b> | <b>Disagree</b> | <b>Agree</b> | <b>Strongly Agree</b> |
|------------------------------------------------------------------------------------|---------------------------------------------------|--------------------------|-----------------|--------------|-----------------------|
| <b>The hospital was:</b>                                                           |                                                   |                          |                 |              |                       |
| <b>1.</b>                                                                          | Dirty                                             | 1                        | 2               | 3            | 4                     |
| <b>2.</b>                                                                          | Free from clutter                                 | 1                        | 2               | 3            | 4                     |
| <b>3.</b>                                                                          | Noisy                                             | 1                        | 2               | 3            | 4                     |
| <b>4.</b>                                                                          | A comfortable temperature                         | 1                        | 2               | 3            | 4                     |
| <b>5.</b>                                                                          | Free from bad smells                              | 1                        | 2               | 3            | 4                     |
| <b>The hospital had:</b>                                                           |                                                   |                          |                 |              |                       |
| <b>6.</b>                                                                          | Overcrowded waiting rooms                         | 1                        | 2               | 3            | 4                     |
| <b>7.</b>                                                                          | Clocks in the waiting rooms                       | 1                        | 2               | 3            | 4                     |
| <b>8.</b>                                                                          | Plenty of windows and natural light               | 1                        | 2               | 3            | 4                     |
| <b>9.</b>                                                                          | Cracks in the walls or peeling paint              | 1                        | 2               | 3            | 4                     |
| <b>10.</b>                                                                         | Comfortable furniture                             | 1                        | 2               | 3            | 4                     |
| <b>11.</b>                                                                         | Art and photography, or other images on the walls | 1                        | 2               | 3            | 4                     |
| <b>12.</b>                                                                         | Indoor plants                                     | 1                        | 2               | 3            | 4                     |
| <b>13.</b>                                                                         | Maps and signs to help you find your way around   | 1                        | 2               | 3            | 4                     |
| <b>14.</b>                                                                         | Good mobile phone reception and public phones     | 1                        | 2               | 3            | 4                     |
| <b>The colour scheme of the hospital was:</b>                                      |                                                   |                          |                 |              |                       |
| <b>15.</b>                                                                         | Dull and dreary                                   | 1                        | 2               | 3            | 4                     |
| <b>16.</b>                                                                         | Calm and relaxing                                 | 1                        | 2               | 3            | 4                     |
| <b>The hospital had:</b>                                                           |                                                   |                          |                 |              |                       |
| <b>17.</b>                                                                         | Quiet spaces                                      | 1                        | 2               | 3            | 4                     |
| <b>18.</b>                                                                         | No outdoor spaces                                 | 1                        | 2               | 3            | 4                     |
| <b>19.</b>                                                                         | Private spaces                                    | 1                        | 2               | 3            | 4                     |
| <b>20.</b>                                                                         | No entertainment e.g. TV or reading materials     | 1                        | 2               | 3            | 4                     |
| <b>21.</b>                                                                         | Relaxing music to listen to                       | 1                        | 2               | 3            | 4                     |
| <b>Overall, I felt the hospital environment:</b>                                   |                                                   |                          |                 |              |                       |
| <b>22.</b>                                                                         | Was pleasant and comfortable                      | 1                        | 2               | 3            | 4                     |
| <b>23.</b>                                                                         | Did not affect my mood or wellbeing               | 1                        | 2               | 3            | 4                     |
